# Supplementary material
Source: PubMed Central journal article supplement (PMC6800003)
Supplement: NIHMS1047128-supplement-Supporting_Information.pdf [file NIHMS1047128-supplement-Supporting_Information.pdf]

Supporting Information

Kinetics and chemistry of hydrolysis of ultrathin, thermally grown layers of silicon oxide as biofluid barriers in flexible electronic systems

Yoon Kyeong Lee<sup>†</sup>, Ki Jun Yu<sup>†</sup>, Yerim Kim, Younghee Yoon, Zhaoqian Xie, Enming Song, Haiwen Luan, Xue Feng, Yonggang Huang, John A. Rogers\*

Y. K. Lee

Department of Chemistry  
University of Illinois at Urbana-Champaign  
Urbana, IL 61801, USA

Y. K. Lee, Y. Kim, Y. Yoon, E. Song  
Department of Materials Science and Engineering  
Frederick Seitz Materials Research Laboratory  
University of Illinois at Urbana-Champaign  
Urbana, IL 61801, USA

Prof. K. J. Yu  
Department of Electrical and Electronic Engineering  
Yonsei University  
Seoul, 03722, Republic of Korea

E. Song  
Department of Materials Science  
Fudan University  
Shanghai 200433 (P. R. China)

Dr. Zhaoqian Xie  
Department of Civil and Environmental Engineering, Mechanical Engineering, and Materials Science and Engineering, Northwestern University, Evanston, IL 60208, USA

AML, Department of Engineering Mechanics, Center for Mechanics and Materials  
Tsinghua University  
Beijing 100084, China

Haiwen Luan, Prof. Yonggang Huang  
Department of Civil and Environmental Engineering, Mechanical Engineering, Materials  
Science and Engineering  
Northwestern University  
Evanston, IL 60208, USA

Prof. Xue Feng  
AML, Department of Engineering Mechanics, Center for Mechanics and Materials  
Tsinghua University  
Beijing 100084, China

Prof. J. A. Rogers  
Center for Bio-Integrated Electronics  
Departments of Materials Science and Engineering, Biomedical Engineering, Chemistry,  
Mechanical Engineering, Electrical Engineering and Computer Science, and Neurological  
Surgery  
Simpson Querrey Institute for Nano/biotechnology, McCormick School of Engineering and  
Feinberg School of Medicine  
Northwestern University  
Evanston, IL 60208, USA

†These authors contributed equally to this work

\*To whom correspondence should be addressed. E-mail: [jrogers@northwestern.edu](mailto:jrogers@northwestern.edu)

|                                                     | PBS            | HBSS                                          | Bovine growth serum*                           | Artificial Perspiration |
|-----------------------------------------------------|----------------|-----------------------------------------------|------------------------------------------------|-------------------------|
| pH                                                  | 7.2-7.4        | 8.3<br>(CO <sub>2</sub> sensitive)            | 7.3-7.5                                        | 4.3-4.7                 |
| NaCl                                                | 138 mM (8 g/L) | 138 mM                                        | Na: 130 mEq/L<br>K: 15.6 mEq/L<br>P: 0.078 g/L | 20 g/L                  |
| KCl                                                 | 2.7 mM         | 5.3 mM                                        |                                                | -                       |
| Na <sub>2</sub> HPO <sub>4</sub>                    | 10 mM (1.4g/L) | 0.3 mM                                        |                                                | -                       |
| KH <sub>2</sub> PO <sub>4</sub>                     | 1.8 mM         | 0.44 mM                                       |                                                | -                       |
| Glucose                                             | -              | 5.6 mM (1 g/L)                                | 1.01 g/L                                       | -                       |
| NaHCO <sub>3</sub>                                  | -              | 4 mM (0.35 g/L)                               |                                                | -                       |
| CaCl <sub>2</sub>                                   | -              | 1.26 mM (0.14g/L)                             | Ca: 0.075 g/L                                  | -                       |
| MgSO <sub>4</sub> 7H <sub>2</sub> O                 | -              | 0.41 mM                                       |                                                | -                       |
| MgCl <sub>2</sub> 6H <sub>2</sub> O                 | -              | 0.5 mM                                        |                                                | -                       |
| NH <sub>4</sub> Cl                                  | -              | -                                             |                                                | 17.5 g/L                |
| Urea (NH <sub>2</sub> CONH <sub>2</sub> )           | -              | -                                             | 0.07 g/L                                       | 5 g/L                   |
| Acetic acid                                         | -              | -                                             |                                                | 2.5 g/L                 |
| Racemic lactic acid<br>(CH <sub>3</sub> CH(OH)COOH) | -              | -                                             |                                                | 15 g/L                  |
| Total protein                                       | -              | -                                             | 56 g/L<br>(albumin: 32 g/L)                    | -                       |
| Others                                              |                | Phenol red (pH indicator) 0.03mM<br>(0.01g/L) |                                                |                         |

\*from certificate analysis from RMBIO

**Table S1. Chemical composition of simulated biofluids**

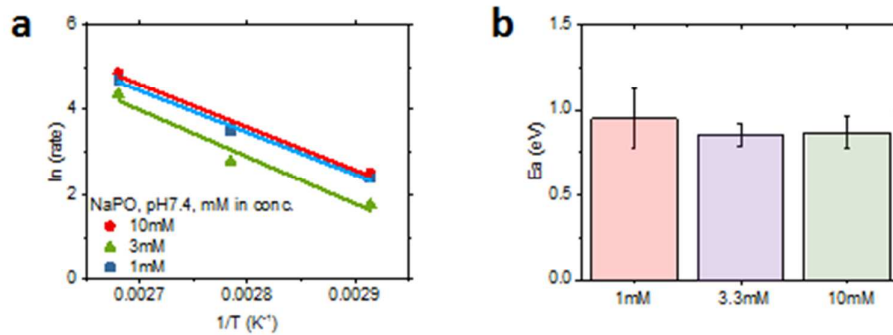

**Fig S1. Dissolution rates in 1,3,10mM NaPO solutions**

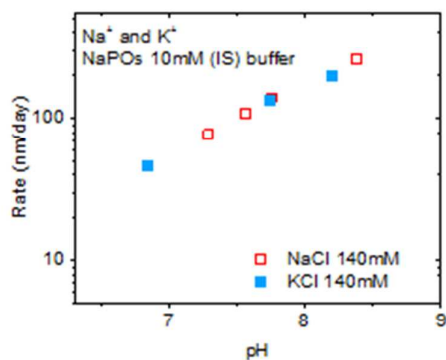

**Fig S2. Dissolution rates in NaCl, KCl solutions**

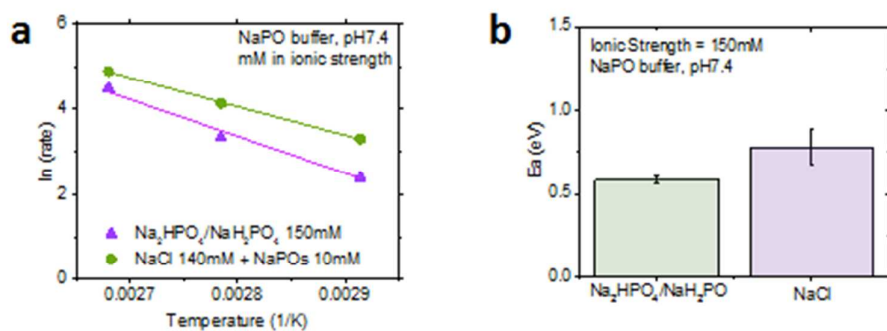

**Fig S3. Dissolution rates in 150mM IS NaCl, and NaPO solutions**
